# Supplementary material
Source: PubMed Central journal article supplement (PMC3366852)
Supplement: supp_M112.354274_jbc.M112.354274-1.pdf [file supp_M112.354274_jbc.M112.354274-1.pdf]

**Supplemental Table 1. Primers used for RNA-PCR**

| Gene                   | Primer sequence                                                             | Reference |
|------------------------|-----------------------------------------------------------------------------|-----------|
| <i>Cathepsin E</i>     | Forward 5'-tcgagtgtcaatgaaccctc-3'<br>Reverse 5'-ggtgcagtacacagaaggac-3'    | (1)       |
| <i>CD74</i>            | Forward 5'-catggatgaccaacgcgac-3'<br>Reverse 5'-tgtacagagctccacggctg-3'     | (2)       |
| <i>CIITA (general)</i> | Forward 5'-tgcaggcgaccaggagagaca-3'<br>Reverse 5'-gaagctgggcacctcaaagat-3'  | (3)       |
| <i>CIITA PI</i>        | Forward 5'-agcactgcatgaaccacttc-3'<br>Reverse 5'-gcacctgctgggcttct-3'       | (4)       |
| <i>CIITA PIII</i>      | Forward 5'-tggctctggccttctg-3'<br>Reverse 5'-cagatccatggtggcacaca-3'        | (4)       |
| <i>CIITA P IV</i>      | Forward 5'-ccccagcctcactgttattca-3'<br>Reverse 5'-tccatggtggcacacagact-3'   | (4)       |
| <i>GADPH</i>           | Forward 5'-tgtgaacggattggccgta-3'<br>Reverse 5'-tcgctctggaagatggtga-3'      | (5)       |
| <i>H2-Aa</i>           | Forward 5'-tgggcaccatcttcattc-3'<br>Reverse 5'-ggcaccagcacaccactt-3'        | (6)       |
| <i>Npc1l1</i>          | Forward 5'-gagagccaaagatgctactatctca-3'<br>Reverse 5'-cccgggaagttggtcatg-3' | (7)       |

**References**

1. Busquets, L., Guillen, H., DeFord, M.E., Suckow, M.A., Navari, R.M., Castellino, F.J., and Prorok, M. (2006). Cathepsin E is a specific marker of dysplasia in APC mouse intestine. *Tumour Biol.* **27**:36-42
2. Marsh, L.M., Cakarova, L., Kwapiszewska, G., von Wulffen, W., Herold, S., Seeger, W., and Lohmeyer, J. (2009). Surface expression of CD74 by type II alveolar epithelial cells: a potential mechanism for macrophage migration inhibitory factor-induced epithelial repair. *Am. J. Physiol. Lung Cell. Mol. Physiol.* **296**:L442-452
3. Gongora, C., Hose, S., O'Brien, T.P., and Sinha, D. (2004). Downregulation of class II transactivator (CIITA) expression by synthetic cannabinoid CP55940. *Immunol. Lett.* **91**:11-6
4. Xu, Y., McDonald, J., Perloff, E., Buttice, G., Schreiber, B.M., and Smith, B.D. (2007). Collagen and major histocompatibility class II expression in mesenchymal cells from CIITA hypomorphic mice. *Mol. Immunol.* **44**:1709-1721
5. Seree, E.M., Villard, P.H., Re, J.L., De Meo, M., Lacarelle, B., Attolini, L., Dumenil, G., Catalin, J., Durand, A., and Barra, Y. (1996). High inducibility of mouse renal CYP2E1 gene by tobacco smoke and its possible effect on DNA single strand breaks. *Biochem. Biophys. Res. Comm.* **219**:429-434
6. Hansen, J.J., Holt, L., and Sartor, R.B. (2009). Gene expression patterns in experimental colitis in IL-10-deficient mice. *Inflamm. Bowel Dis.* **15**:890-899
7. van der Veen, J.N., Kruit, J.K., Havinga, R., Baller, J.F., Chimini, G., Lestavel, S., Staels, B., Groot, P.H., Groen, A.K., and Kuipers, F. (2005). Reduced cholesterol absorption upon PPARdelta activation coincides with decreased intestinal expression of NPC1L1. *J. Lipid Res.* **46**:526-534
