# Supplementary material
Source: PubMed Central journal article supplement (PMC3366852)
Supplement: supp_M112.354274_jbc.M112.354274-2.pdf [file supp_M112.354274_jbc.M112.354274-2.pdf]

**Supplemental Table 2.** *CYP transcripts detected by microarray analysis in the enterocytes of WT and IE-Cpr-null mice.*

CYPs that were called *present* by the MAS5.0 program in all four enterocyte RNA samples of each mouse strain (IE-Cpr-null or WT) are shown. The results are grouped by *Cyp* subfamily when at least two subfamily members were detected.

| <b>Gene Subfamily</b> | <b>Gene Symbol</b>                                          |
|-----------------------|-------------------------------------------------------------|
| <i>Cyp1a</i>          | <i>Cyp1a1, Cyp1a2<sup>a</sup></i>                           |
| <i>Cyp2b</i>          | <i>Cyp2b10, Cyp2b9</i>                                      |
| <i>Cyp2c</i>          | <i>Cyp2c29, Cyp2c38, Cyp2c44, Cyp2c55, Cyp2c65, Cyp2c68</i> |
| <i>Cyp2d</i>          | <i>Cyp2d22, Cyp2d26</i>                                     |
| <i>Cyp2j</i>          | <i>Cyp2j6, Cyp2j9</i>                                       |
| <i>Cyp3a</i>          | <i>Cyp3a11, Cyp3a13, Cyp3a25, Cyp3a41a/b, Cyp3a44</i>       |
| <i>Cyp4f</i>          | <i>Cyp4f13, Cyp4f14, Cyp4f16</i>                            |
| <i>Other</i>          | <i>Cyp2s1, Cyp4a10, Cyp4b1, Cyp4v3, Cyp27a1, Cyp51</i>      |

<sup>a</sup> Detected only in IE-Cpr-null mice
