# Supplementary material
Source: PubMed Central journal article supplement (PMC3366852)
Supplement: supp_M112.354274_jbc.M112.354274-3.pdf [file supp_M112.354274_jbc.M112.354274-3.pdf]

**Supplemental Table 3. Genes with significantly increased expression in GO terms identified in Table 2**

| Gene Ontology term                                 | Gene Symbol    | Gene name                                                         |
|----------------------------------------------------|----------------|-------------------------------------------------------------------|
| <b>Antigen processing and presentation</b>         |                |                                                                   |
|                                                    | <i>H2-gs10</i> | MHC class I like protein GS10                                     |
|                                                    | <i>CD74</i>    | CD74 antigen (invariant polypeptide of MHC II antigen-associated) |
|                                                    | <i>H2-Aa</i>   | Histocompatibility 2, class II antigen A, $\alpha$                |
|                                                    | <i>H2-Ab1</i>  | Histocompatibility 2, class II antigen A, $\beta$ 1               |
|                                                    | <i>H2-DMa</i>  | Histocompatibility 2, class II, locus DMa                         |
|                                                    | <i>H2-Dmb2</i> | Histocompatibility 2, class II, locus DMb2                        |
|                                                    | <i>H2-Eb1</i>  | Histocompatibility 2, class II antigen E $\beta$                  |
|                                                    | <i>H2-M3</i>   | Histocompatibility 2, M region locus 3                            |
|                                                    | <i>H2-Q7</i>   | Histocompatibility 2, Q region locus 7                            |
|                                                    | <i>Psmb9</i>   | Proteasome (prosome, macropain) subunit, $\beta$ type 9           |
|                                                    | <i>Relb</i>    | Avian reticuloendotheliosis viral (v-rel) oncogene related B      |
| <b>Isoprenoid biosynthetic process</b>             |                |                                                                   |
|                                                    | <i>Aacs</i>    | Acetoacetyl-CoA synthetase                                        |
|                                                    | <i>Fdft1</i>   | Farnesyl diphosphate farnesyl transferase 1                       |
|                                                    | <i>Fdps</i>    | Farnesyl diphosphate synthetase                                   |
|                                                    | <i>Idi1</i>    | Isopentenyl-diphosphate delta isomerase                           |
|                                                    | <i>Mvd</i>     | Mevalonate (diphospho) decarboxylase                              |
|                                                    | <i>Mvk</i>     | Mevalonate kinase                                                 |
| <b>MHC protein complex</b>                         |                |                                                                   |
|                                                    | <i>H2-gs10</i> | MHC class I like protein GS10                                     |
|                                                    | <i>H2-Aa</i>   | Histocompatibility 2, class II antigen A, $\alpha$                |
|                                                    | <i>H2-Ab1</i>  | Histocompatibility 2, class II antigen A, $\beta$ 1               |
|                                                    | <i>H2-DMa</i>  | Histocompatibility 2, class II, locus DMa                         |
|                                                    | <i>H2-Dmb2</i> | Histocompatibility 2, class II, locus DMb2                        |
|                                                    | <i>H2-Eb1</i>  | Histocompatibility 2, class II antigen E $\beta$                  |
|                                                    | <i>H2-M3</i>   | Histocompatibility 2, M region locus 3                            |
|                                                    | <i>H2-Q7</i>   | Histocompatibility 2, Q region locus 7                            |
| <b>Multivesicular Body</b>                         |                |                                                                   |
|                                                    | <i>Cd74</i>    | CD74 antigen (invariant polypeptide of MHC II antigen-associated) |
|                                                    | <i>H2-Aa</i>   | Histocompatibility 2, class II antigen A, $\alpha$                |
|                                                    | <i>H2-Dma</i>  | Histocompatibility 2, class II, locus DMa                         |
|                                                    | <i>H2-Dmb2</i> | Histocompatibility 2, class II, locus DMb2                        |
| <b>Negative regulation of transferase activity</b> |                |                                                                   |
|                                                    | <i>Cdkn1b</i>  | Cyclin-dependent kinase inhibitor 1B                              |
|                                                    | <i>Cln8</i>    | Ceroid-lipofuscinosis, neuronal 8                                 |
|                                                    | <i>Gadd45b</i> | Growth arrest and DNA-damage-inducible 45 $\beta$                 |
|                                                    | <i>Hmgcr</i>   | 3-hydroxy-3-methylglutaryl-Coenzyme A reductase                   |
| <b>Steroid metabolic process</b>                   |                |                                                                   |
|                                                    | <i>Cln8</i>    | Ceroid-lipofuscinosis, neuronal 8                                 |
|                                                    | <i>Cyp51</i>   | Cytochrome P450 51                                                |
|                                                    | <i>Fdft1</i>   | Farnesyl diphosphate farnesyl transferase 1                       |
|                                                    | <i>Fdps</i>    | farnesyl diphosphate synthetase                                   |
|                                                    | <i>Hmgcr</i>   | 3-hydroxy-3-methylglutaryl-Coenzyme A reductase                   |
|                                                    | <i>Hmgcs1</i>  | 3-hydroxy-3-methylglutaryl-Coenzyme A synthase 1                  |
|                                                    | <i>Hsd17b7</i> | Hydroxysteroid (17-beta) dehydrogenase 7                          |
|                                                    | <i>Idi1</i>    | Isopentenyl-diphosphate delta isomerase                           |
|                                                    | <i>Ldlr</i>    | Low density lipoprotein receptor                                  |
|                                                    | <i>Lss</i>     | Lanosterol synthase                                               |
|                                                    | <i>Mvd</i>     | Mevalonate (diphospho) decarboxylase                              |
|                                                    | <i>Mvk</i>     | Mevalonate kinase                                                 |
|                                                    | <i>Osbpl5</i>  | Oxysterol binding protein-like 5                                  |
|                                                    | <i>Pmvk</i>    | Phosphomevalonate kinase                                          |
|                                                    | <i>Tm7sf2</i>  | Transmembrane 7 superfamily member 2                              |
