# Supplementary material
Source: PubMed Central journal article supplement (PMC3366852)
Supplement: supp_M112.354274_jbc.M112.354274-4.pdf [file supp_M112.354274_jbc.M112.354274-4.pdf]

**Supplemental Table 4.** Genes with significantly decreased expression in GO terms identified in Table 2

| Gene Ontology term                                                                                           | Gene Symbol                     | Gene name                                                                                     |
|--------------------------------------------------------------------------------------------------------------|---------------------------------|-----------------------------------------------------------------------------------------------|
| <b>Apical part of cell</b>                                                                                   | <i>Abcc2</i>                    | ATP-binding cassette, sub-family C (CFTR/MRP), member 2                                       |
|                                                                                                              | <i>Cfr</i>                      | Cystic fibrosis transmembrane conductance regulator homolog                                   |
|                                                                                                              | <i>Cubn</i>                     | Cubilin (intrinsic factor-cobalamin receptor)                                                 |
|                                                                                                              | <i>Lgmn</i>                     | Legumain                                                                                      |
|                                                                                                              | <i>Muc3</i>                     | Mucin 3, intestinal                                                                           |
|                                                                                                              | <i>Slc46a1</i>                  | Solute carrier family 46, member 1                                                            |
| <b>Hormone metabolic process</b>                                                                             | <i>Afp</i>                      | Alpha fetoprotein                                                                             |
|                                                                                                              | <i>Dio1</i>                     | Deiodinase, iodothyronine, type I                                                             |
|                                                                                                              | <i>Hsd3b2/3/6</i>               | Hydroxy- $\delta$ -5-steroid dehydrogenase, 3 $\beta$ - and steroid $\delta$ -isomerase 2/3/6 |
|                                                                                                              | <i>Retsat</i>                   | Retinol saturase (all trans retinol 13,14 reductase)                                          |
|                                                                                                              | <i>Tph1</i>                     | Tryptophan hydroxylase 1                                                                      |
|                                                                                                              | <i>Wnt4</i>                     | Wingless-related MMTV integration site 4                                                      |
| <b>Oxidoreductase activity, acting on paired donors, with incorporation or reduction of molecular oxygen</b> | <i>Bbox1</i>                    | Butyrobetaine ( $\gamma$ ), 2-oxoglutarate dioxygenase 1                                      |
|                                                                                                              | <i>Cyp27a1</i>                  | Cytochrome P450 27a1                                                                          |
|                                                                                                              | <i>Cyp2d16</i>                  | Cytochrome P450 2d16                                                                          |
|                                                                                                              | <i>Cyp2j6</i>                   | Cytochrome P450 2j6                                                                           |
|                                                                                                              | <i>Cyp4a10</i>                  | Cytochrome P450 4a10                                                                          |
|                                                                                                              | <i>Fmo1</i>                     | Flavin containing monooxygenase 1                                                             |
|                                                                                                              | <i>Kdm2b</i>                    | Lysine (K)-specific demethylase 2B                                                            |
|                                                                                                              | <i>Restat</i>                   | Retinol saturase (all trans retinol 13,14 reductase)                                          |
|                                                                                                              | <i>Tph1</i>                     | Tryptophan hydroxylase 1                                                                      |
|                                                                                                              | <b>Serine esterase activity</b> | <i>2210023g05rik</i>                                                                          |
| <i>Bche</i>                                                                                                  |                                 | Butyrylcholinesterase                                                                         |
| <i>Es22</i>                                                                                                  |                                 | Esterase 22                                                                                   |
| <i>Ppme1</i>                                                                                                 |                                 | Protein phosphatase methylesterase 1                                                          |
